# Supplementary material
Source: HighWire-hosted journal article supplement (http://www.qdcxjkg.com/highwire/filestream/114048/field_highwire_adjunct_files/0/ERJ-01642-2012_Disclosures.pdf)
Supplement: ERJ-01642-2012_Disclosures.pdf [file ERJ-01642-2012_Disclosures.pdf]

**P.R. Burgel** has been part of Advisory Boards for Almirall, Novartis, Nycomed. He has also received fees for lectures from Astra-Zeneca, Boehringer Ingelheim, Chiesi, GSK, Pfizer, Pierre Fabre.

**D.J. Dusser** has been part of Advisory Boards for Boehringer Ingelheim-Pfizer, Nycomed, Chiesi, Novartis, DEY Pharma LP. He has also received fees for lectures from Chiesi, Boehringer Ingelheim-Pfizer. Industry-sponsored grants for education were received from GlaxoSmithKline, Boehringer Ingelheim and AstraZeneca.
